# Supplementary material for: Viral Particle-Mediated SAMHD1 Depletion Sensitizes Refractory Glioblastoma to DNA-Damaging Therapeutics by Impairing Homologous Recombination
Source: MDPI journal article supplement (doi:10.3390/cancers14184490), 2022-09-16

Supplementary Files,

# Viral particle-mediated SAMHD1 depletion sensitizes refractory glioblastoma to DNA-damaging therapeutics by impairing homologous recombination.

Waaqo Daddacha<sup>1,2,\*</sup>, Dominique Monroe<sup>1,2</sup>, Kristen Carver<sup>1</sup>, Edidiong Usoro<sup>1,2</sup>, Ahmet Alptekin<sup>2</sup>, Hongyan Xu<sup>3</sup>, Satoru Osuka<sup>4</sup>, Ali S Arbab<sup>1,2</sup>, and Daitoku Sakamuro<sup>1,2</sup>

<sup>1</sup> Department of Biochemistry and Molecular Biology, Medical College of Georgia, Augusta University, Augusta, GA 30912

<sup>2</sup> Georgia cancer center, Augusta University, Augusta GA 30912.

<sup>3</sup> Department of Population Health Sciences, Medical College of Georgia, Augusta University, GA 30912.

<sup>4</sup> Department of Neurosurgery, Heersink School of Medicine, The University of Alabama, Birmingham, AL, 35233.

\* Correspond to Dr. Waaqo Daddacha at : wdaddacha@augusta.edu; Tel. 706721 0272

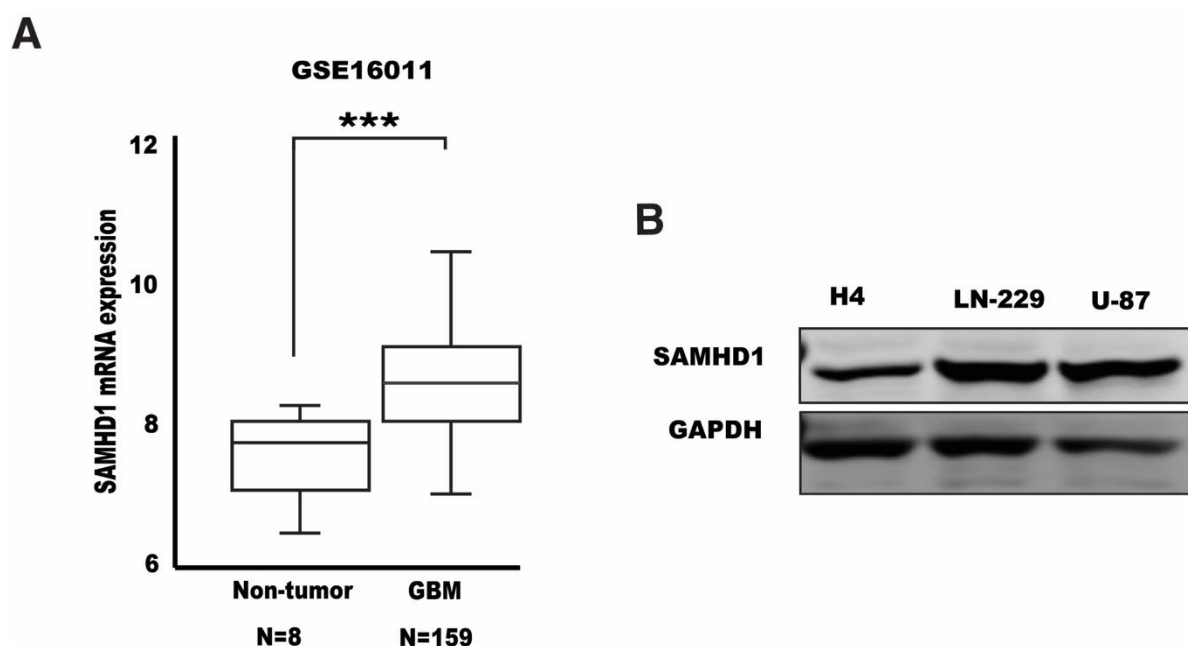

**Supplementary Figure S1. SAMHD1 is highly expressed in GBM.** (A) GSE16011 dataset that contains 159 GBM and 8 non-tumor brain tissue were analyzed for SAMHD1 expression. (B) Three established cell line H4, representing low grade glioma, and LN-229 and U-87, representing GBM, were analyzed for SAMHD1 level. Asterisks represent the p-values (\* $\leq 0.05$ , \*\* $\leq 0.01$ , and \*\*\* $\leq 0.001$ ).

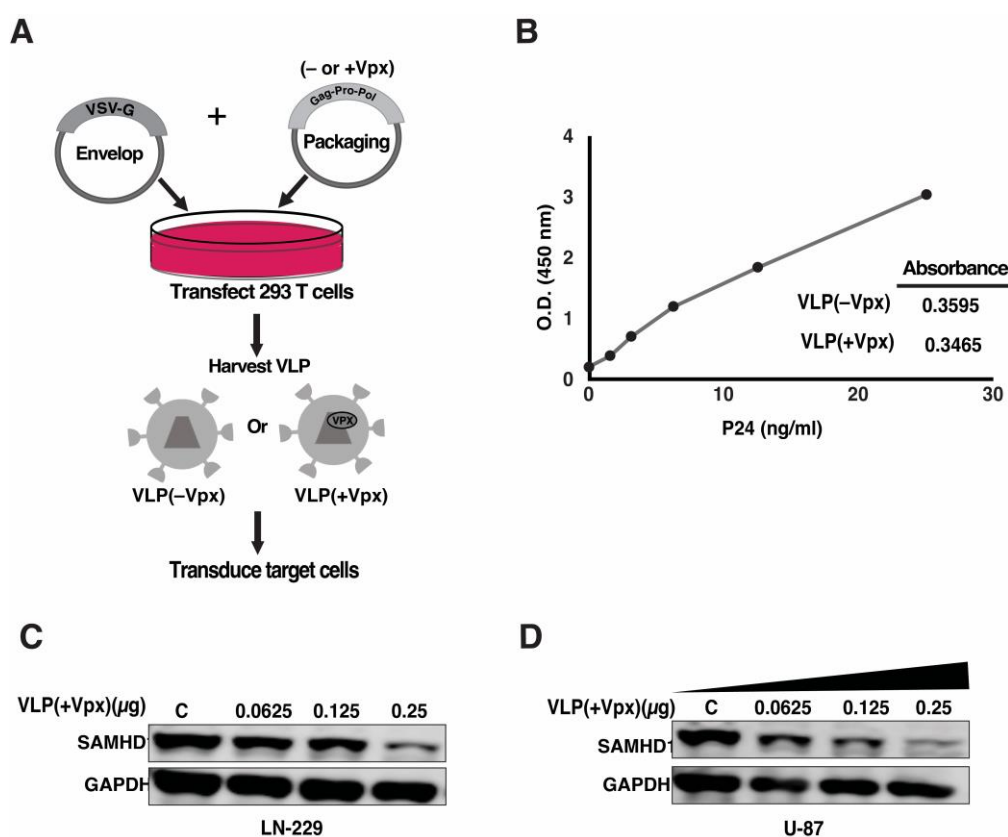

**Supplementary Figure S2, SAMHD1 is successfully deleted by delivering Vpx into GBM cells** (A) Schematic diagram describing the generation of Viral-like particles (VLPs) from 293 cells after co-transfection with VSVG and packaging plasmids that do not encode for Vpx (-Vpx) or encodes for Vpx (+Vpx). (B) The titration of VLPs to determine the quantity of particles to be used. The graph is a representation of the absorbance corresponding to the concentration of a known standard. The measured absorbance value for the generated VLP (-Vpx) and (+Vpx) are presented in the graph. (C-D) SAMHD1 degradation efficiency of varying quantity of VLP(+Vpx) in LN-229 (C) and U-87 (D) cell lines.

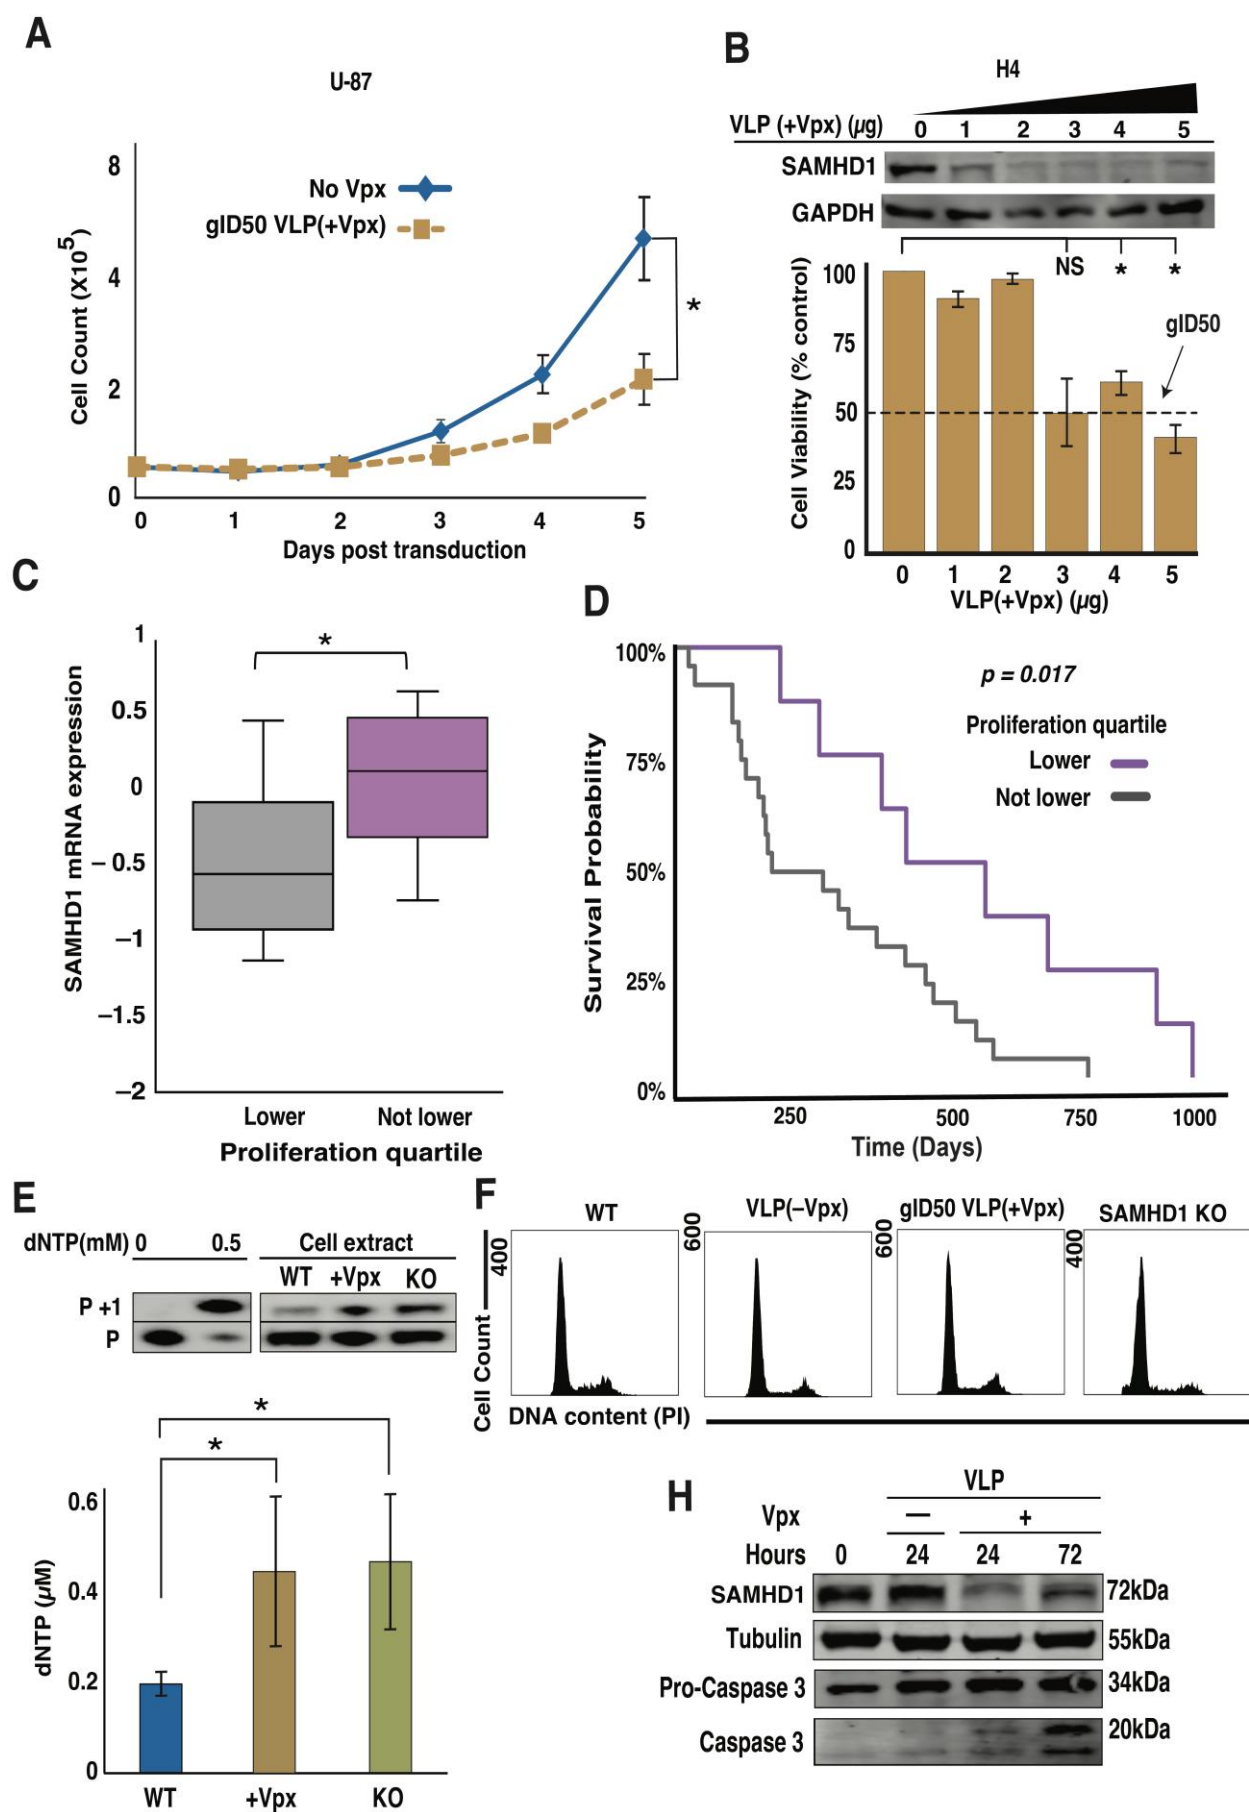

**Supplementary Figure S3, SAMHD1 expression level correlated with cell proliferation.** (A) Five days-long U-87 growth was assessed post 24 h gID50 VLP(+Vpx) exposure. (B) H4 cells were transduced with varying concentrations of VLP(+Vpx). Then, 24 hours post-transduction, cells were collected and analyzed for SAMHD1 degradation efficiency (top), while the rest were seeded on 96 well plate for AlamarBlue-based cell viability assay (bottom). (C–D) The dataset was obtained from the HGCC database and analyzed. (C) The SAMHD1 expression level in patient-derived glioblastoma cells (PDGC) with low and not low proliferation quartile was compared by a one-tailed student T-test. (D) Survival profile of PDGC mice xenograft. The implanted PDGC cells were divided into low and not low proliferation rates and analyzed. (E) Cellular dNTP was extracted from gID50 VLP(+Vpx) and KO LN-229. The extract was assessed with HIV-1 RT-based primer extension assay. The product was resolved (top), and concentration was determined after quantification (bottom). (F) The cell cycle profile of gID50 VLP(+VPx) transduced and KO LN-229. p-values (\* $\leq 0.05$ , \*\* $\leq 0.01$ , and \*\*\* $\leq 0.001$ ).

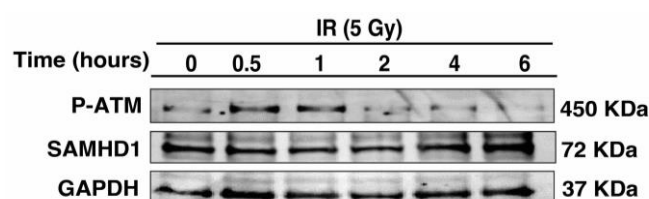

**Supplementary Figure S4, ATM is phosphorylation.** LN-229 cells were exposed to 5 Gy IR and lysed at different times between 30 minutes and 6 hours. The lysate was resolved and probed for indicated genes and ATP phosphorylation.

**Table S1: Primary Antibodies**

| Name           | Species | Company        | Catalog #  |
|----------------|---------|----------------|------------|
| SAMHD1         | Rabbit  | Proteintech    | 12586-1-ap |
| SAMHD1         | Mouse   | Origene        | TA502024   |
| P-ATM          | Mouse   | Cell Signaling | 4526S      |
| GAPDH          | Mouse   | Santa Cruz     | sc-47724   |
| GAPDH          | Rabbit  | Cell Signaling | 2118S      |
| P-Chk2         | Rabbit  | Cell Signaling | 2197S      |
| p53            | Rabbit  | Santa Cruz     | sc-6243    |
| RPA70          | Rabbit  | Cell Signaling | 2267S      |
| yH2AX          | Mouse   | Millipore      | 05-636     |
| pRPA32 (S4/S8) |         |                |            |
|                |         |                |            |

**Table S2: Secondary Antibodies**

| Name                      | Species | Company    | Catalog # |
|---------------------------|---------|------------|-----------|
| Anti-mouse IgG Alexa 555  | Donkey  | Invitrogen | A31570    |
| Anti-rabbit IgG-Alexa 555 | Donkey  | Invitrogen | A31572    |
| Anti-mouse IgG- Alexa 488 | Donkey  | Invitrogen | A21202    |
| Anti-rabbit IgG-Alexa 488 | Donkey  | Invitrogen | A21206    |

Raw Western blots

Figure 1C

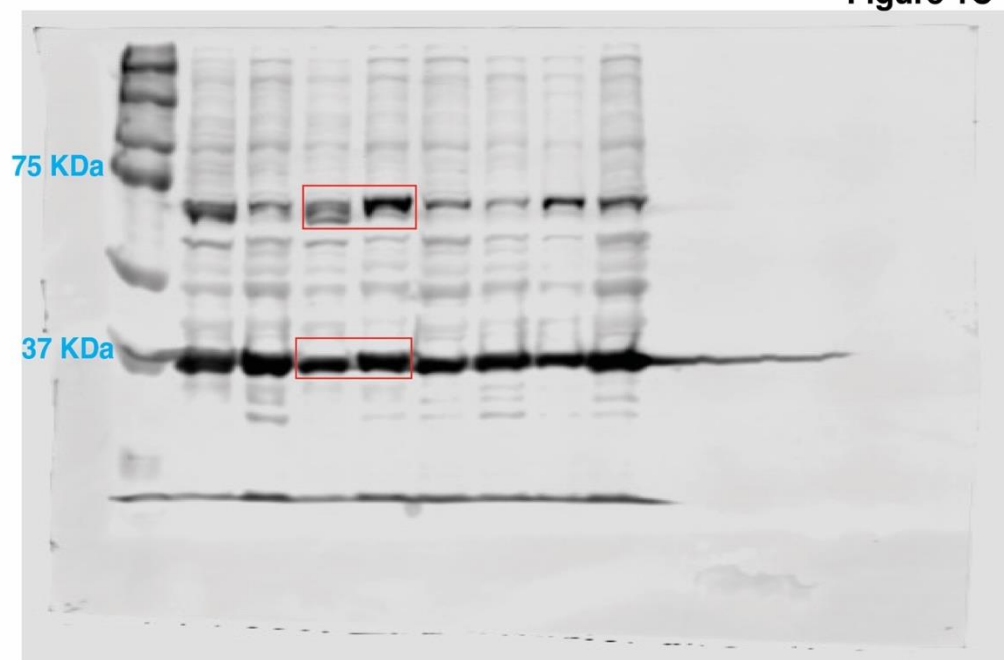

Figure 3A

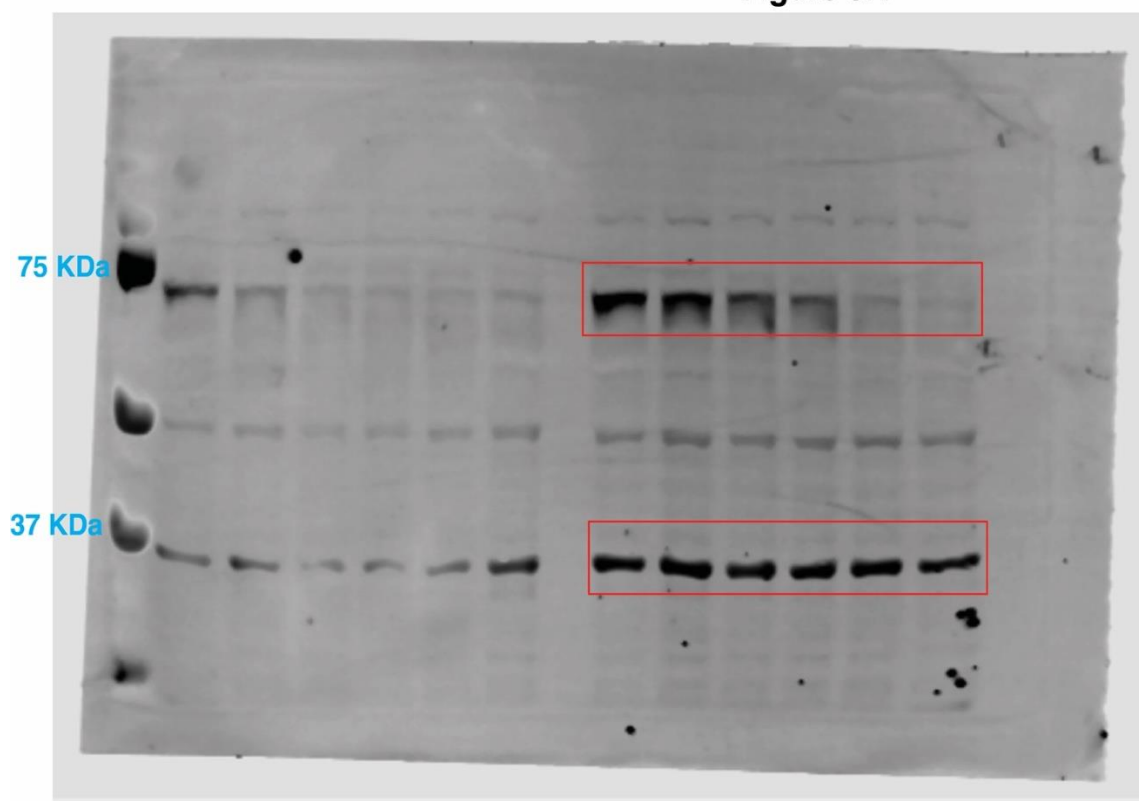

Figure 3C

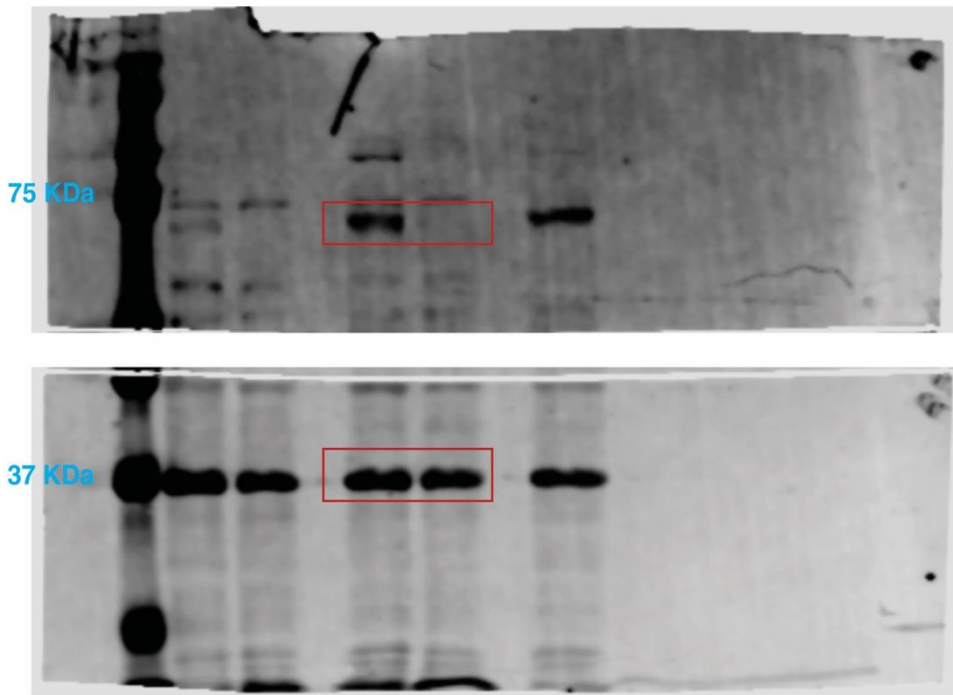

Figure 3E

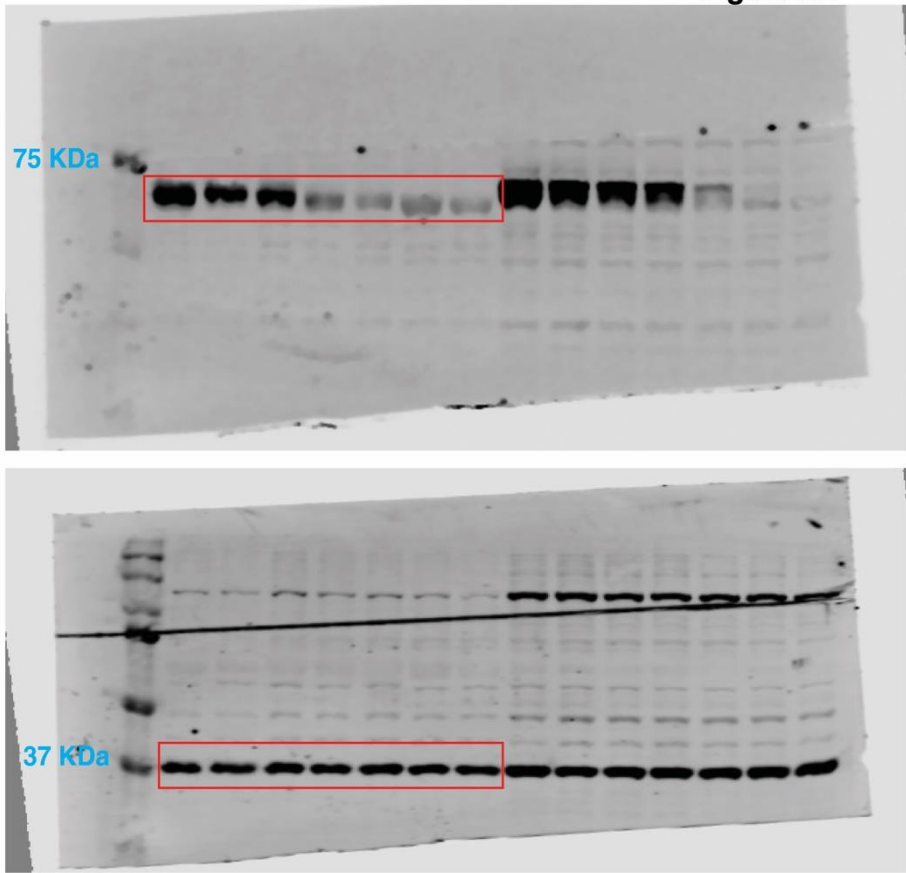

Figure 4D

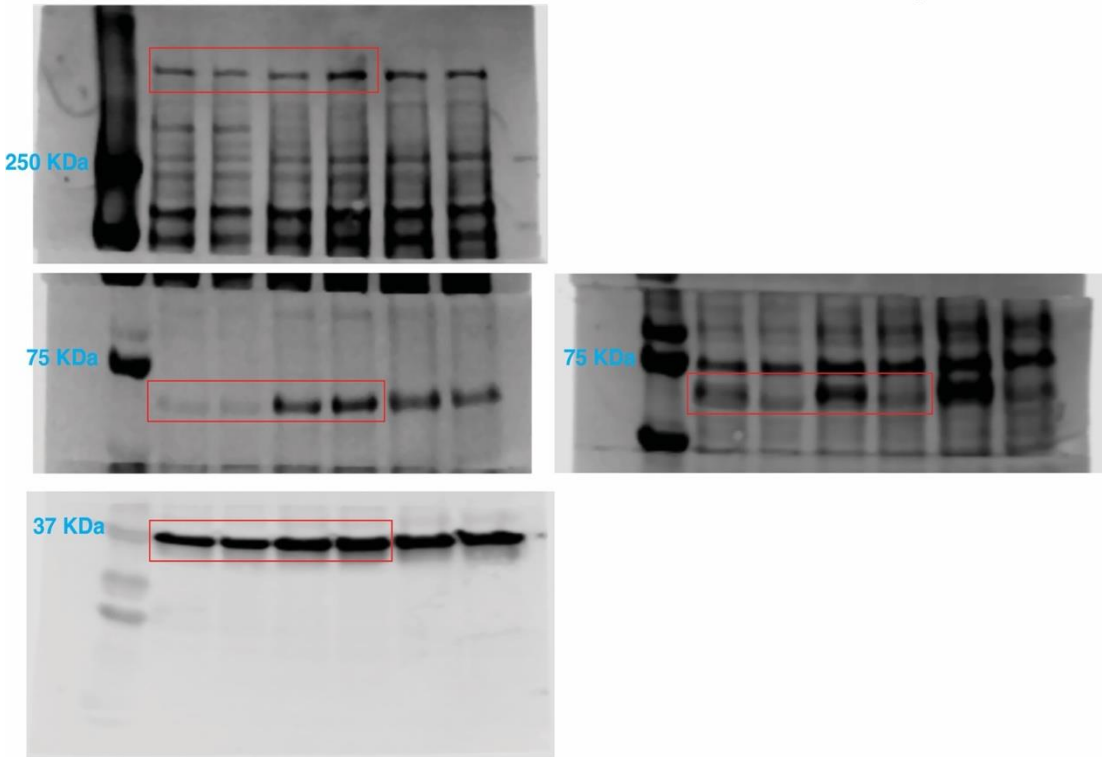

Figure 4E

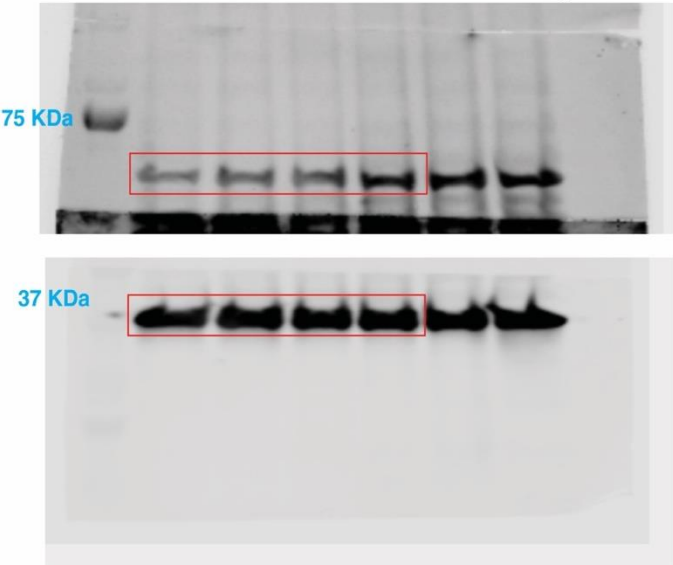

Figure 5A

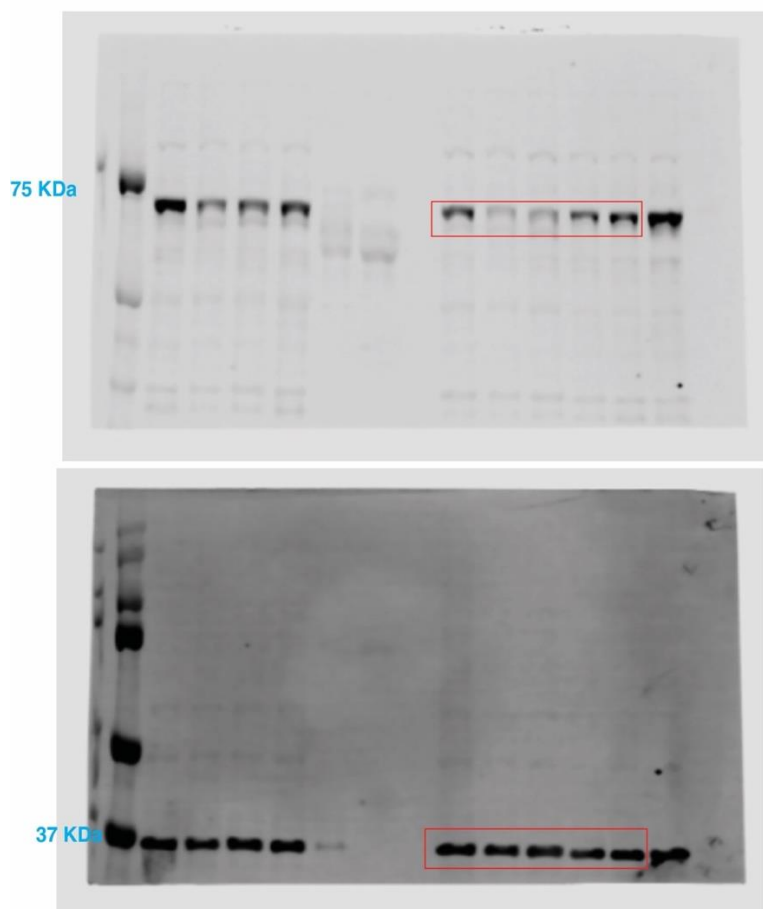



Supplementary Figure 1B

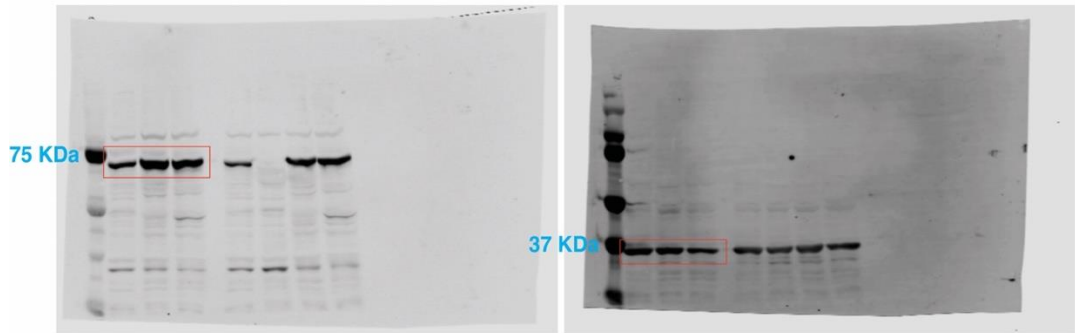

Supplementary Figure 2C

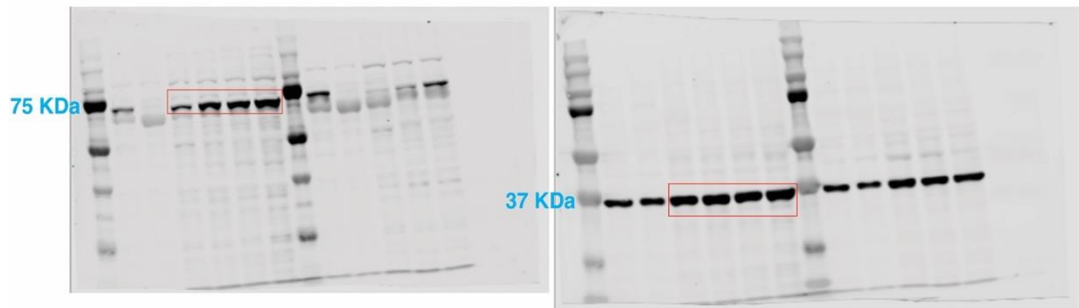

Supplementary Figure 2D

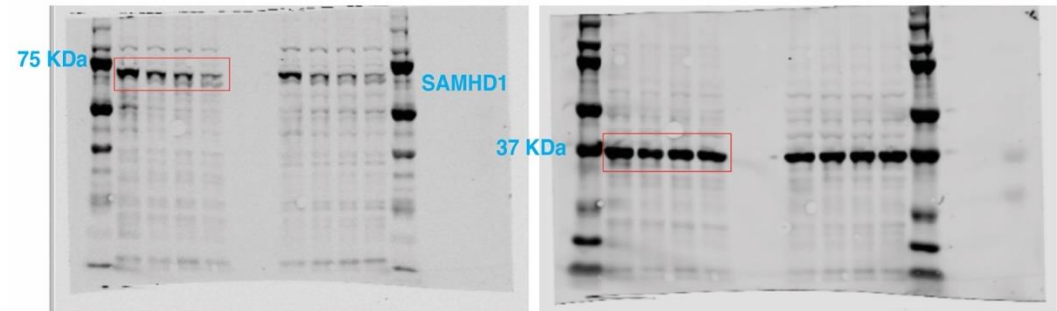

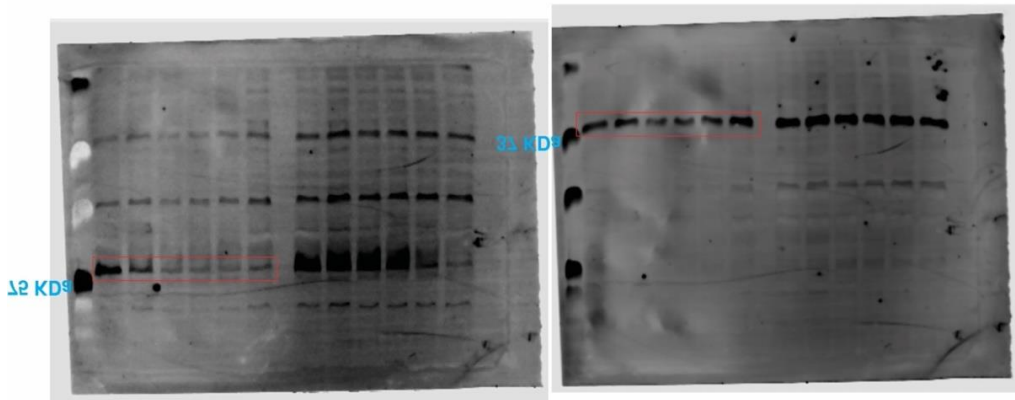

Supplementary Figure 3B  
Supplementary Figure 3G

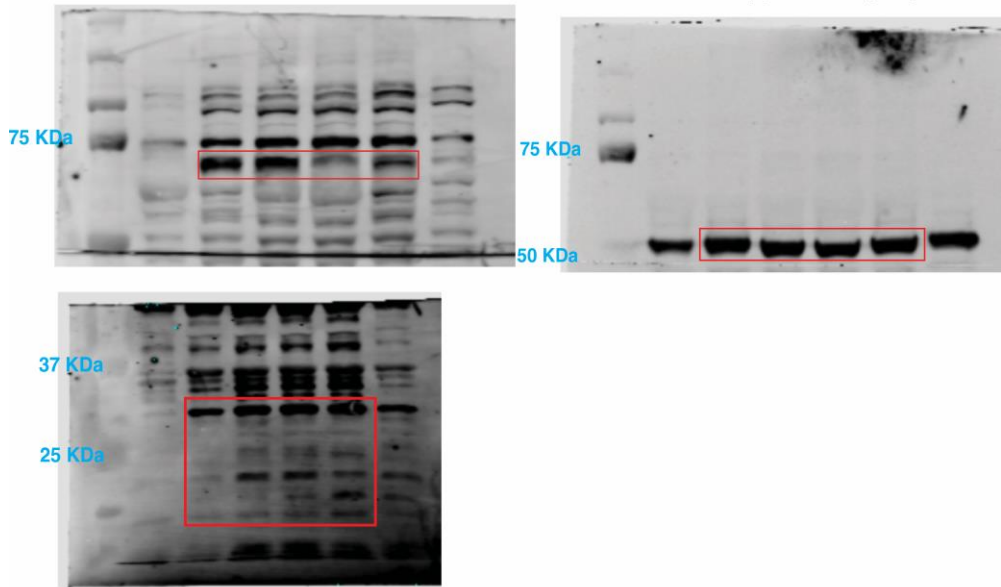

Supplementary Figure 4

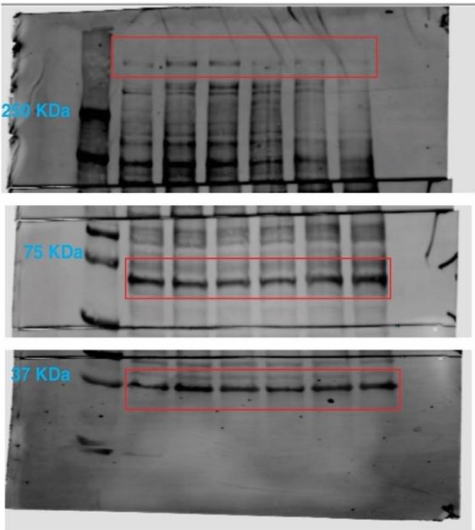

Supplement: s1 [file s1]
